# Supplementary material
Source: publisher figshare collection journal article supplement (https://gsapubs.figshare.com/ndownloader/files/22388052)
Supplement: Supplementary file 1 [file 22388052]

## Sheet: Sheet1
Orr, E.N., Owen, L.A., Saha, S., and Caffee, M.W., 2020, Climate-driven late Quaternary fan surface abandonment in the NW Himalaya, in Waitt, R.B., Thackray, G.D., and Gillespie, A.R., eds.,
Untangling the Quaternary Period: A Legacy of Stephen C. Porter: Geological Society of America Special Paper 548, https://doi.org/10.1130/2020.2548(04).
Appendix S4. Sample details of Semi-arid Western Himalayan Ranges (SWHR) regional aggradation and incision events (all uncertainties expressed to 1σ)
Landform No.	Sample Name	Latitude	Longitude	Elevation	Depth	TSF*	10Be conc	Conc. Error	LSD exposure age†	External Error
		(oN)	(oE)	(m asl)	(cm)		(106 atoms/g)	(106 atoms/g)	(ka)	(ka)
REGIONAL AGGRADATION EVENTS
Blöthe et al. (2014)
Indus	Igor	34.1558	77.3633	3360	5	0.994	6.46055	0.25541	154.4	14.9
Zanskar	ZKR-TT-A	34.097	77.2189	3340	5	0.973	4.99688	0.09955	121.9	10.9
Zanskar	ZKR-DD-Ter	34.1437	77.2993	3178	5	0.917	1.08	0.0216	32.1	2.8
Zanskar	ZKR-DD	34.1437	77.2993	3178	5	0.917	1.0202	0.0216	30.4	2.7
Brown et al. (2002, 2003), Dortch et al. (2011b)
Tangtse1	KK97-36	34.006	78.299	4350	5	0.977	2	0.1	32.19	2.57
Tangtse1	KK97-37	34.006	78.299	4350	5	0.977	2.4	0.2	38.63	3.16
Tangtse1	KK97-38	34.006	78.299	4350	5	0.977	1.1	0.1	19	1.72
Tangtse1	KK97-39	34.006	78.299	4350	5	0.977	1.3	0.1	21.71	1.64
Tangtse1	KK97-40	34.006	78.299	4350	5	0.977	1.3	0.1	21.71	1.64
Tangtse1	KK98-9	34.006	78.299	4350	5	0.977	1.1	0.1	19	1.72
Tangtse1	KK98-10	34.006	78.299	4350	5	0.977	1.1	0.2	19	3.03
Tangtse1	KK98-11	34.006	78.299	4350	5	0.977	1	0.1	17.46	1.79
Tangtse1	KK98-12	34.006	78.299	4350	5	0.977	1.2	0.1	20.44	1.62
Tangtse1	KK98-13	34.006	78.299	4350	5	0.977	2.9	0.2	45.1	4.7
Tangtse2	KK98-1	34.006	78.299	4350	5	0.977	0.1	0.04	2.07	0.88
Tangtse2	KK98-3	34.006	78.299	4350	5	0.977	0.2	0.03	4.19	0.63
Tangtse2	KK98-4	34.006	78.299	4350	5	0.977	0.5	0.05	9.44	1.08
Tangtse2	KK98-5	34.006	78.299	4350	5	0.977	0.1	0.01	2.06	0.25
Tangtse2	KK98-6	34.006	78.299	4350	5	0.977	0.4	0.04	7.48	0.76
Tangtse2	KK98-7	34.006	78.299	4350	5	0.977	0.3	0.1	5.94	1.65
Tangtse2	KK98-8	34.006	78.299	4350	5	0.977	0.8	0.1	14.32	1.7
Tangtse2	KK98-14	34.006	78.299	4350	5	0.977	0.1	0.01	2.06	0.25
Tangtse2	KK98-15	34.006	78.299	4350	5	0.977	0.1	0.01	2.06	0.25
REGIONAL INCISION EVENTS
Dortch et al. (2011a)
Stok	zk37	34.003	77.512	3923	5	0.92	17.6	0.436	400.71	25.08
Sacha	zk48	33.787	77.805	3479	5	0.91	23.3	0.657	790.15	43.42
Sacha	zk49	33.811	77.805	3495	5	0.92	20.1	0.446	631.56	42.64
Sacha	zk50	33.736	77.741	3490	5	0.94	15	0.371	442.78	30.11
Indus	I-66	34.12	77.432	3240	5	0.98	0.878	0.017	27.23	1.49
Indus	I-62	34.121	77.419	3235	5	0.98	1.17	0.023	36.51	2.02
Indus	I-63	34.121	77.419	3235	5	0.97	2.21	0.04	69.71	4.32
Indus	I-64	34.124	77.42	3120	5	0.95	0.374	0.049	14.18	1.8
Indus	I-67	34.007	77.689	3150	5	0.98	2.26	0.034	75.18	4.56
Indus	I-71	34.263	77.067	3010	5	0.96	0.307	0.011	12.44	0.8
Indus	I-72	34.251	77.105	3025	5	0.98	3.03	0.072	105.52	5.29
Indus	I-73	34.166	77.335	3097	5	0.96	0.262	0.007	10.33	0.56
Indus	I-76	34.17	77.332	3065	5	0.99	0.44	0.009	16.27	0.9
Indus	I-77	34.169	77.332	3055	5	0.98	0.296	0.009	11.47	0.63
Indus	I-78	34.169	77.332	3050	5	0.98	0.337	0.012	13.05	0.8
Ladakh	LDK-241	34.517	77.416	3783	5	1	3.18	0.047	69.08	4.2
Ladakh	LDK-240	34.517	77.416	3765	5	0.83	1.35	0.023	35.69	1.94
Ladakh	LDK-239	34.517	77.416	3741	5	0.56	0.171	0.005	7.77	0.45
Brown et al. (2002, 2003), Dortch et al. (2011b)
Tangtse	Pang-8	34.047	78.154	3986	1	0.983	0.682	0.029	14.59	0.87
Tangtse	Pang-9	34.047	78.154	3983	5	0.983	0.724	0.035	15.81	1.04
Tangtse	Pang-10	34.047	78.154	3981	4	0.983	0.957	0.044	20.13	1.19
Tangtse	Pang-11	34.047	78.155	3982	5	0.983	0.63	0.021	14.01	0.82
Tangtse	Pang-12	34.047	78.154	3983	5	0.983	1.69	0.045	34.15	2.2
Tangtse	Pang-13	34.047	78.154	3978	5	0.982	2.444	0.085	48.55	4.3
Tangtse	Pang-14	34.024	78.195	4037	3	0.815	2.4	0.058	56.81	3.81
Tangtse	Pang-15A	34.024	78.197	4016	3	0.915	1.019	0.056	21.88	1.35
Tangtse	Pang-15B	34.024	78.197	4016	3	0.915	1.554	0.069	32.3	2.48
Tangtse	Pang-30	34.009	78.302	4164	2	0.977	2.305	0.058	40.36	1.77
Tangtse	Pang-31	34.009	78.302	4170	4	0.977	2.247	0.085	40.02	1.97
Tangtse	Pang-32	34.009	78.303	4167	5	0.976	2.483	0.062	43.71	2.76
Tangtse	Pang-33	34.032	78.209	4065	4	0.936	7.009	0.158	133.56	8.09
Tangtse	Pang-34	34.033	78.21	4028	3	0.931	0.611	0.026	13.81	0.86
Tangtse	KK97-24	34.008	78.311	4225	5	0.977	0.884	0.077	16.98	1.59
Tangtse	KK97-26	34.008	78.311	4225	5	0.977	1.355	0.134	24.26	2.33
Tangtse	KK97-27	34.008	78.311	4225	5	0.977	3.984	0.314	70.57	6.8
Tangtse	KK97-28	34.008	78.311	4225	5	0.977	0.73	0.081	14.32	1.52
Tangtse	KK97-29	34.008	78.311	4185	5	0.977	0.78	0.105	15.41	1.98
Tangtse	KK97-30	34.008	78.311	4185	5	0.977	0.725	0.078	14.51	1.53
Tangtse	KK97-33	34.008	78.311	4185	5	0.977	0.884	0.095	17.3	1.88
Tangtse	KK97-34	34.008	78.311	4185	5	0.977	0.631	0.053	12.86	1.2
Tangtse	KK97-35	34.008	78.311	4185	5	0.977	0.847	0.073	16.63	1.54
Tangtse	PK93-21	35.48	75.4	2235	1	0.977	1.299	0.142	31.9	2.5
Tangtse	PK93-22	35.48	75.4	2235	2	0.977	1.532	0.421	85.6	7.7
Tangtse	PK93-24	35.48	75.39	2198	1	0.977	1.452	0.088	37.7	4.5
Tangtse	PK93-25	35.51	75.35	2198	3	0.977	0.754	0.053	61.4	7.2
Tangtse	PK93-19	35.51	75.35	2082	3	0.977	1.174	0.038	115	12
Tangtse	PK93-30	35.67	74.92	1802	5	0.977	0.103	0.031	17.2	5.7
Tangtse	PK95-32	35.67	74.92	1822	1	0.977	0.103	0.031	3.4	0.9
Tangtse	PK95-36	35.67	74.92	1850	1	0.977	0.326	0.028	10.2	1.1
Tangtse	PK93-37	35.67	74.92	2138	5	0.977	0.006	0.001	0.92	0.17
Tangtse	PK93-38	35.67	74.92	1729	2	0.977	0.547	0.05	39	5
Tangtse	PK93-40	35.71	74.75	1883	1	0.977	0.094	0.02	3	0.6
Tangtse	PK95-21	35.63	75.06	1675	4	0.977	0.875	0.043	174	25
Tangtse	PK95-13	35.78	74.63	2009	3	0.977	0.132	0.014	10.8	1.3
Tangtse	PK95-13	35.72	74.65	1355	2	0.977	0.082	0.011	7.2	1.1
Tangtse	PK95-9	35.72	74.63	1311	2	0.977	0.104	0.011	9.6	1.1
Seong et al. (2007), Dortch et al. (2011b)
Dassu	K2-21	35.715	75.522	2433	5	0.93	0.221	0.015	12.75	1.07
Chapok	K2-42	35.732	75.665	2671	5	0.98	0.038	0.006	1.96	0.35
Chapok	K2-43	35.732	75.665	2671	5	0.92	0.029	0.005	1.57	0.3
Pakora	K2-64	35.691	75.731	2855	5	0.82	0.029	0.005	1.57	0.3
Askole	K2-71	35.671	75.861	3010	5	0.76	0.311	0.01	14.79	0.84
Biafo	K2-100	35.65	76.033	3215	5	0.99	0.377	0.027	12.34	1.05
Phanmah	K2-101	35.65	76.033	3215	5	0.97	0.391	0.011	13.03	0.75
*: Topographic Shielding Factor
†: LSD age (internal/external errors quoted) is calculated using the Balco et al. (2008) calibration dataset (10Be decay constant of 5.1±0.3x10-7), and Lifton et al. (2014) calculation scheme
with the Lifton 2016 VDM geomagnetic database. Production rate for the CREP calculator is 4.13±0.2 10Be atoms/grams SiO2/year (Martin et al., 2016) with a 10Be half-life of 1.36Ma.
Density of 2.7 g cm3, AMS Standard of 07KNSTD.
